# Supplementary material
Source: publisher figshare collection journal article supplement (https://gsapubs.figshare.com/ndownloader/files/22408608)
Supplement: Supplementary file 1 [file 22408608]

Jones, C.H., Reeg, H., Zandt, G., Gilbert, H., Owens, T.J., and Stachnik, J., 2014, P-wave tomography of potential convective downwellings and their source regions, Sierra Nevada, California: Geosphere, v. 10, doi:10.1130/GES00961.1.

Supplemental Table 1. The SNEP array station information.

| **Station** | **Latitude (deg)** | **Longitude (deg)** | **Elevation (m)** | **Install date** | **Removal date** | **Instrument type** |
| --- | --- | --- | --- | --- | --- | --- |
| SN11 | 36.69920 | -119.31200 | 171 | 5/22/05 | 8/06/06 | Broadband |
| SN12 | 36.91260 | -119.03990 | 1284 | 6/15/05 | 5/30/07 | Broadband |
| SN14 | 37.13960 | -118.77420 | 3056 | 8/31/05 | 9/12/07 | Broadband |
| SN15 | 37.27810 | -118.59940 | 2434 | 8/11/05 | 7/28/06 | Broadband |
| SN16 | 37.35020 | -118.25540 | 1898 | 7/29/05 | 7/28/06 | Broadband |
| SN21 | 36.82020 | -119.51310 | 229 | 5/26/05 | 8/06/06 | Broadband |
| SN22 | 37.01050 | -119.36020 | 1207 | 6/16/05 | 8/09/06 | Broadband |
| SN23 | 37.12340 | -119.21410 | 2087 | 6/20/05 | 8/09/06 | Broadband |
| SN24 | 37.28010 | -118.97250 | 2264 | 7/24/05 | 5/28/07 | Broadband |
| SN25 | 37.35930 | -118.70450 | 2466 | 7/28/05 | 7/28/06 | Broadband |
| SN26 | 37.57180 | -118.48750 | 1680 | 6/03/05 | 7/27/06 | Broadband |
| SN27 | 37.65990 | -118.35160 | 1739 | 7/29/05 | 7/28/06 | Broadband |
| SN28 | 37.89640 | -118.15730 | 1641 | 6/06/05 | 7/27/06 | Broadband |
| SN34 | 37.39090 | -119.06270 | 2401 | 9/23/05 | 5/29/07 | Broadband |
| SN36 | 37.68320 | -118.64680 | 2457 | 7/30/05 | 7/28/06 | Broadband |
| SN37 | 37.81680 | -118.54560 | 1939 | 6/02/05 | 7/28/06 | Broadband |
| SN38 | 38.05140 | -118.35280 | 2063 | 6/05/05 | 7/27/06 | Broadband |
| SN42 | 37.24630 | -119.57830 | 942 | 5/19/05 | 1/22/06 | Broadband |
| S42A | 37.24700 | -119.56850 | 1012 | 1/24/06 | 8/07/06 | Broadband |
| SN43 | 37.41290 | -119.48450 | 2274 | 7/19/05 | 5/26/07 | Broadband |
| SN44 | 37.50030 | -119.27910 | 2070 | 7/22/05 | 8/06/06 | Broadband |
| SN45 | 37.68260 | -119.08270 | 2571 | 7/26/05 | 8/26/06 | Broadband |
| SN46 | 37.78340 | -118.90180 | 2751 | 7/26/05 | 7/28/06 | Broadband |
| SN47 | 37.98000 | -118.72920 | 2074 | 6/02/05 | 7/29/06 | Broadband |
| SN48 | 38.16930 | -118.55850 | 1838 | 6/04/05 | 7/29/06 | Broadband |
| SN51 | 37.25290 | -120.05810 | 250 | 5/27/05 | 8/07/06 | Broadband |
| SN52 | 37.34260 | -119.81470 | 341 | 6/14/05 | 8/09/06 | Broadband |
| SN53 | 37.51380 | -119.67480 | 1459 | 6/21/05 | 8/09/06 | Broadband |
| SN54 | 37.73580 | -119.51250 | 1868 | 10/1/05 | 8/14/06 | Broadband |
| SN55 | 37.87960 | -119.33250 | 2693 | 10/3/05 | 9/21/07 | Broadband |
| SN56 | 37.97390 | -119.16930 | 2944 | 7/27/05 | 8/16/06 | Broadband |
| SN57 | 38.14340 | -118.96670 | 2090 | 6/02/05 | 7/29/06 | Broadband |
| SN62 | 37.58820 | -120.00460 | 651 | 5/20/05 | 8/10/06 | Broadband |
| SN63 | 37.72270 | -119.80670 | 1906 | 8/03/05 | 9/23/07 | Broadband |
| SN64 | 37.86520 | -119.64690 | 2423 | 10/4/05 | 9/21/07 | Broadband |
| SN65 | 38.00020 | -119.51080 | 2895 | 9/25/05 | 9/12/07 | Broadband |
| SN66 | 38.18000 | -119.34120 | 2429 | 8/10/05 | 7/29/06 | Broadband |
| SN67 | 38.28270 | -119.14790 | 2277 | 6/11/05 | 7/29/06 | Broadband |
| SN71 | 37.64200 | -120.40380 | 157 | 5/21/05 | 8/10/06 | Broadband |
| SN73 | 37.82330 | -120.11160 | 982 | 7/18/05 | 8/10/06 | Broadband |
| SN74 | 37.98540 | -119.93180 | 1684 | 7/23/05 | 5/27/07 | Broadband |
| SN75 | 38.12620 | -119.69660 | 2665 | 9/04/05 | 9/08/07 | Broadband |
| SN76 | 38.36170 | -119.51370 | 2106 | 8/10/05 | 8/16/06 | Broadband |
| SN84 | 38.15620 | -120.14650 | 1610 | 7/21/05 | 5/25/07 | Broadband |
| SN85 | 38.28480 | -119.95370 | 2003 | 7/20/05 | 5/25/07 | Broadband |
| SN86 | 38.49270 | -119.80690 | 2632 | 7/21/05 | 9/16/07 | Broadband |
| SN87 | 38.68160 | -119.61140 | 2708 | 8/04/06 | 9/16/07 | Broadband |
| SN93 | 38.15260 | -120.60460 | 402 | 8/01/06 | 9/16/07 | Broadband |
| SN95 | 38.33310 | -120.25260 | 1754 | 7/20/05 | 5/27/07 | Broadband |
| SN96 | 38.47510 | -120.04220 | 2243 | 8/04/06 | 9/16/07 | Broadband |
| SN97 | 38.80900 | -119.80580 | 1770 | 7/31/05 | 9/16/07 | Broadband |
| SN98 | 38.91780 | -119.41670 | 1521 | 1/06/07 | 9/15/07 | Broadband |
| SNA3 | 38.38230 | -120.70910 | 578 | 8/02/06 | 9/17/07 | Broadband |
| SNA4 | 38.50180 | -120.53500 | 1146 | 8/02/06 | 9/17/07 | Broadband |
| SNA5 | 38.64200 | -120.32560 | 1744 | 7/31/05 | 9/16/07 | Broadband |
| SNA7 | 39.00810 | -119.89490 | 2350 | 7/31/05 | 9/15/07 | Broadband |
| SNA8 | 39.09630 | -119.60210 | 2004 | 8/08/06 | 9/15/07 | Broadband |
| SNB3 | 38.56190 | -120.99110 | 245 | 8/02/06 | 9/17/07 | Broadband |
| SNB5 | 38.83410 | -120.54520 | 1404 | 8/16/06 | 9/17/07 | Broadband |
| SNB6 | 38.88380 | -120.26540 | 2230 | 8/01/06 | 9/17/07 | Broadband |
| SNB7 | 39.05160 | -120.15480 | 2021 | 8/08/06 | 9/20/07 | Broadband |
| SNB9 | 39.35970 | -119.59140 | 1855 | 8/08/06 | 9/15/07 | Broadband |
| SNC3 | 38.70280 | -121.19620 | 76 | 8/01/06 | 9/17/07 | Shortperiod  (9/06-1/07); otherwise Broadband |
| SNC4 | 38.84840 | -120.95010 | 516 | 8/02/06 | 9/18/07 | Broadband |
| SNC5 | 39.02780 | -120.75340 | 1006 | 8/11/06 | 9/18/07 | Broadband |
| SNC6 | 39.08890 | -120.46570 | 1887 | 9/02/06 | 9/18/07 | Broadband |
| SNC7 | 39.31470 | -120.38800 | 2281 | 8/18/06 | 9/19/07 | Broadband |
| SNC8 | 39.47250 | -120.04080 | 2562 | 8/09/06 | 9/20/07 | Broadband |
| SND4 | 39.03730 | -121.16990 | 402 | 8/17/06 | 9/18/07 | Broadband |
| SND5 | 39.19420 | -120.93130 | 792 | 8/03/06 | 9/19/07 | Broadband |
| SND7 | 39.62480 | -120.57600 | 1690 | 9/09/06 | 9/19/07 | Broadband |
| SND8 | 39.65020 | -120.22460 | 1546 | 8/07/06 | 9/20/07 | Broadband |
| SND9 | 39.82590 | -120.00950 | 1608 | 1/05/07 | 9/19/07 | Broadband |
| SNE4 | 39.23630 | -121.34690 | 88 | 8/03/06 | 9/20/07 | Broadband |
| SNE5 | 39.38370 | -121.16260 | 945 | 8/11/06 | 9/20/07 | Broadband |
| SNE6 | 39.47820 | -120.84590 | 1479 | 8/12/06 | 9/20/07 | Broadband |
| SNE7 | 39.80430 | -120.71360 | 1537 | 8/13/06 | 9/20/07 | Broadband |
| SNE9 | 40.02500 | -120.18750 | 1797 | 8/07/06 | 9/20/07 | Shortperiod  (8/06-1/07); otherwise Broadband |
| SNF6 | 39.68180 | -121.09130 | 1535 | 8/12/06 | 9/20/07 | Broadband |
| SNF8 | 40.01120 | -120.64120 | 2148 | 8/11/06 | 9/20/07 | Broadband |
| SNF9 | 40.18080 | -120.39730 | 1331 | 8/10/06 | 9/20/07 | Shortperiod  (8/06-1/07); otherwise Broadband |
| SNG5 | 39.71900 | -121.52700 | 652 | 8/12/06 | 9/20/07 | Broadband |
| SNG7 | 40.10950 | -121.17230 | 1591 | 8/11/06 | 9/20/07 | Broadband |
| SNG9 | 40.34530 | -120.60170 | 1332 | 8/10/06 | 9/20/07 | Shortperiod  (8/06-1/07); otherwise Broadband |
| YO01 | 37.75110 | -119.78320 | 1866 | 7/02/07 | 9/23/07 | Broadband |
| YO02 | 37.77310 | -119.75800 | 2116 | 7/02/07 | 9/22/07 | Broadband |
| YO03 | 37.78900 | -119.73240 | 2078 | 7/03/07 | 9/22/07 | Broadband |
| YO04 | 37.82000 | -119.71030 | 2210 | 7/04/07 | 9/22/07 | Broadband |
| YO05 | 37.83900 | -119.68950 | 2385 | 7/06/07 | 9/22/07 | Broadband |
| YO06 | 37.85080 | -119.61460 | 2507 | 7/04/07 | 9/21/07 | Broadband |
| YO07 | 37.81390 | -119.58000 | 2495 | 7/06/07 | 9/21/07 | Broadband |
| YO08 | 37.80700 | -119.54520 | 2493 | 7/06/07 | 9/21/07 | Broadband |
| YO09 | 37.81540 | -119.50060 | 2575 | 7/07/07 | 9/21/07 | Broadband |
| YO10 | 37.85480 | -119.44010 | 2576 | 7/07/07 | 9/21/07 | Broadband |
| YO11 | 37.88070 | -119.40330 | 2624 | 7/07/07 | 9/21/07 | Broadband |
